# Supplementary material for: The power of monitoring: optimizing survey designs to detect occupancy changes in a rare amphibian population
Source: PubMed Central journal article supplement (PMC5705711; doi:10.1038/s41598-017-16534-8), 2017-11-28
Supplement: 41598_2017_16534_MOESM1_ESM.pdf [file 41598_2017_16534_MOESM1_ESM.pdf]

**The power of monitoring: optimizing survey designs to detect occupancy changes in a rare amphibian population**

Izabela M. Barata<sup>1\*</sup>, Richard A. Griffiths<sup>1</sup> and Martin S. Ridout<sup>2</sup>

*<sup>1</sup> Durrell Institute of Conservation and Ecology, School of Anthropology and Conservation, University of Kent, Canterbury, Kent, CT2 7NR, UK*

*<sup>2</sup> National Centre for Statistical Ecology, School of Mathematics, Statistics and Actuarial Science, University of Kent, Canterbury, Kent, CT2 7NF, UK*

\* Corresponding author: [ib208@kent.ac.uk](mailto:ib208@kent.ac.uk)

## Supplementary information

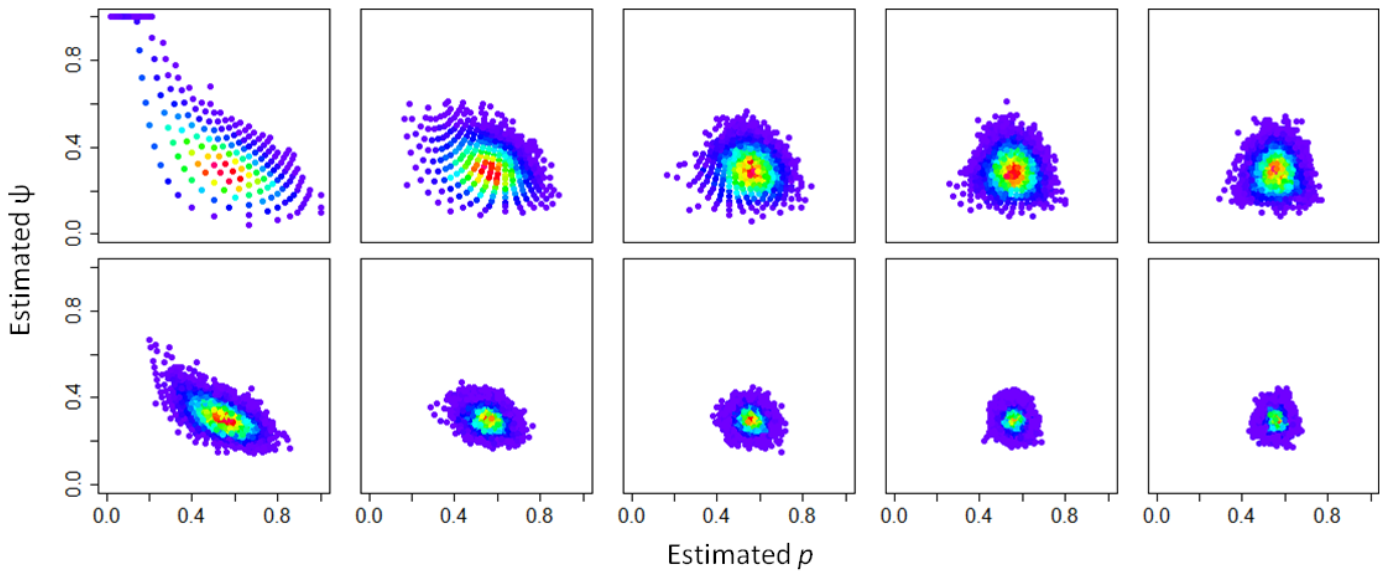

**Figure S1.** Distribution of the maximum likelihood estimates with varying number of occasions (2–6 visits) and with a constant number of sites (first line,  $S = 50$ ; second line  $S = 150$ ). Estimates are based on constant model  $\psi(\cdot)p(\cdot)$  using detection history of sites and neighbours from 2014 dataset, where  $\psi = 0.3$ ,  $p = 0.56$  (10000 iterations).

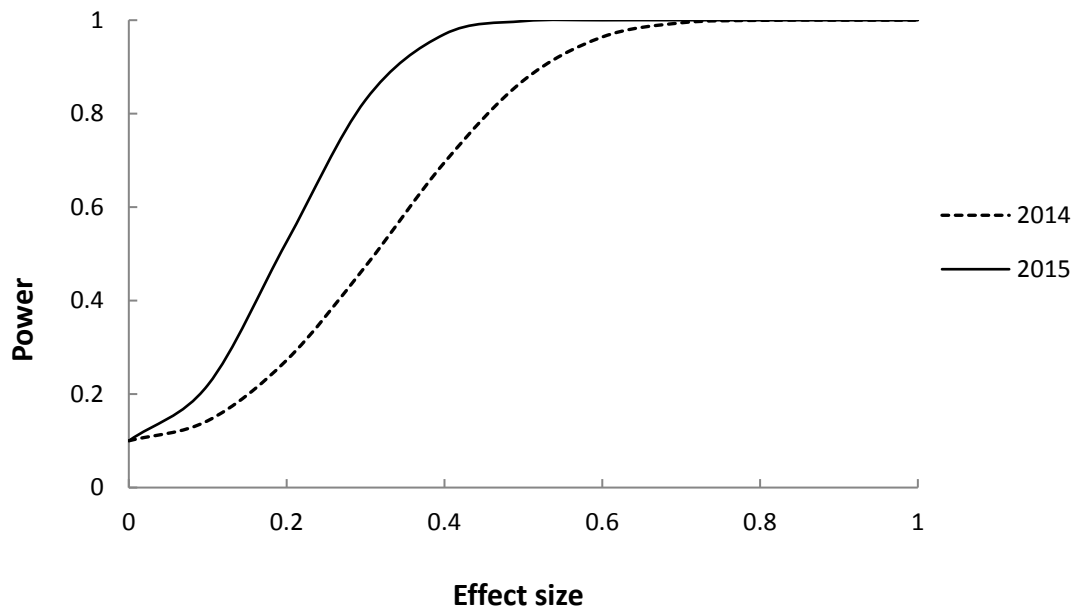

**Figure S2.** Statistical power between years in relation to effect size (absolute change in occupancy) for 2014 (123 sampling sites, 4 sampling occasions,  $\psi = 0.3$ ,  $p = 0.56$ ) and 2015 (143 sampling sites, 21 sampling occasions,  $\psi = 0.49$ ,  $p = 0.54$ ) ( $\alpha = 0.1$  for both datasets).

**Table S1.** Naïve occupancy, estimated occupancy ( $\psi$ ) and detection probability ( $p$ ) based on a constant model  $\psi(\cdot)p(\cdot)$  for **A)** 2014 and 2015 monthly dataset using site only and **B)** for 2015 complete dataset using patch data (sites and neighbours), giving 95% confidence interval (CI), number of sampling sites (S) and number of occasions (K); where  $p^*$  is the probability of detecting a species at an occupied site at least once, given by:  $p^* = 1 - (1 - p)^K$

**A)**

|                             | naïve $\psi$ | $\psi$ | CI          | $p$  | CI          | $p^*$ | S   | K |
|-----------------------------|--------------|--------|-------------|------|-------------|-------|-----|---|
| <b>2014 monthly dataset</b> |              |        |             |      |             |       |     |   |
| FEB                         | 0.27         | 0.30   | 0.22 – 0.4  | 0.56 | 0.45 – 0.66 | 0.96  | 123 | 4 |
| <b>2015 monthly dataset</b> |              |        |             |      |             |       |     |   |
| FEB                         | 0.25         | 0.36   | 0.27 – 0.46 | 0.41 | 0.33 – 0.50 | 0.93  | 131 | 5 |
| MAR                         | 0.25         | 0.27   | 0.21 – 0.35 | 0.64 | 0.57 – 0.71 | 1.00  | 143 | 6 |
| APR                         | 0.36         | 0.37   | 0.29 – 0.45 | 0.62 | 0.55 – 0.68 | 0.99  | 143 | 5 |
| MAY                         | 0.29         | 0.29   | 0.22 – 0.37 | 0.59 | 0.51 – 0.65 | 0.99  | 143 | 5 |

**B)**

|                              | Naïve $\psi$ | $\psi$ | CI          | $p$  | CI          | $p^*$ | S   | K  |
|------------------------------|--------------|--------|-------------|------|-------------|-------|-----|----|
| <b>2015 complete dataset</b> |              |        |             |      |             |       |     |    |
| 2015                         | 0.50         | 0.50   | 0.41 – 0.58 | 0.54 | 0.51 – 0.57 | 1.00  | 143 | 21 |
| <b>Season</b>                |              |        |             |      |             |       |     |    |
| DRY                          | 0.45         | 0.45   | 0.37 – 0.54 | 0.63 | 0.59 – 0.67 | 1.00  | 143 | 11 |
| WET                          | 0.40         | 0.41   | 0.33 – 0.59 | 0.59 | 0.55 – 0.63 | 1.00  | 143 | 10 |
| <b>Gradient</b>              |              |        |             |      |             |       |     |    |
| HIGH                         | 0.67         | 0.67   | 0.52 – 0.78 | 0.52 | 0.48 – 0.56 | 1.00  | 48  | 19 |
| MED                          | 0.68         | 0.68   | 0.54 – 0.80 | 0.56 | 0.52 – 0.59 | 1.00  | 47  | 20 |
| LOW                          | 0.14         | 0.14   | 0.07 – 0.27 | 0.54 | 0.45 – 0.62 | 1.00  | 48  | 18 |

**Table S2.** Fitted models for 2015 complete dataset (detection history from sites and neighbouring bromeliads): A) with covariates for detectability ( $p$ ) and constant occupancy ( $\psi$ ); and B) including covariates for both parameters. N Pars = number of parameters;  $\Delta$ AIC is the difference between the model with the lowest AIC and the given model; AIC  $w$  is AIC weight. Constant model is also included, given by  $\psi(\cdot)p(\cdot)$ ; covariates of detectability are: obs = observer experience, neig = number of neighbours in the patch, leaf = number of leaves in bromeliad, time = time of observation, vol = volume of rosette; covariates of occupancy are: alt = elevation, size = size of bromeliad.

**A)**

| Model                       | N Pars | AIC     | $\Delta$ AIC | AIC $w$ | Cumulative Weight |
|-----------------------------|--------|---------|--------------|---------|-------------------|
| $\psi(\cdot)p(\text{obs})$  | 3      | 1906.82 | 0.00         | 0.96    | 0.96              |
| $\psi(\cdot)p(\text{neig})$ | 3      | 1912.98 | 6.16         | 0.044   | 1.00              |
| $\psi(\cdot)p(\cdot)$       | 2      | 1924.19 | 17.37        | <0.001  | 1.00              |
| $\psi(\cdot)p(\text{leaf})$ | 3      | 1924.23 | 17.42        | <0.001  | 1.00              |
| $\psi(\cdot)p(\text{time})$ | 3      | 1925.29 | 18.48        | <0.001  | 1.00              |
| $\psi(\cdot)p(\text{vol})$  | 3      | 1925.58 | 18.76        | <0.001  | 1.00              |

**B)**

| Model                            | N Pars | AIC     | $\Delta$ AIC | AIC $w$ | Cumulative Weight |
|----------------------------------|--------|---------|--------------|---------|-------------------|
| $\psi(\text{alt})p(\text{obs})$  | 4      | 1882.82 | 0.00         | 1       | 1.00              |
| $\psi(\text{alt})p(\cdot)$       | 3      | 1900.19 | 17.37        | <0.001  | 1.00              |
| $\psi(\text{size})p(\text{obs})$ | 4      | 1904.36 | 21.54        | <0.001  | 1.00              |
| $\psi(\cdot)p(\text{obs})$       | 3      | 1906.82 | 24.00        | <0.001  | 1.00              |
| $\psi(\text{size})p(\cdot)$      | 3      | 1921.74 | 38.92        | <0.001  | 1.00              |
| $\psi(\cdot)p(\cdot)$            | 2      | 1924.19 | 41.37        | <0.001  | 1.00              |

**Table S3.** Number of surveys required to determine species presence at occupied site given 80%, 90% or 95% certainty.  $S$  = number of sites surveyed;  $K$  = number of visits;  $\psi$  = estimated occupancy;  $p$  = estimated detectability for each dataset. Estimates are based on constant model  $\psi(\cdot)p(\cdot)$  using monthly detection history of sites only. Minimum and maximum number of surveys needed are given in bold.

|      | $S$ | $K$ | $\psi$ | $p$  | N survey needed |     |            |
|------|-----|-----|--------|------|-----------------|-----|------------|
|      |     |     |        |      | 0.8             | 0.9 | 0.95       |
| 2014 | 123 | 4   | 0.3    | 0.56 | 2.0             | 2.8 | 3.6        |
| FEB  | 131 | 5   | 0.36   | 0.41 | 3.1             | 4.4 | <b>5.7</b> |
| MAR  | 143 | 6   | 0.27   | 0.64 | <b>1.6</b>      | 2.3 | 2.9        |
| APR  | 143 | 5   | 0.37   | 0.62 | 1.7             | 2.4 | 3.1        |
| MAY  | 143 | 5   | 0.37   | 0.62 | 1.7             | 2.4 | 3.1        |

**Table S4.** Number of sampling sites needed to achieve a given power (G; from 80–95%), considering different effect sizes (R; from 0.5–0.15) and varying significance level ( $\alpha$ ; from 0.05–0.2) (based on estimates of best model for 2015 complete dataset:  $\psi = 0.49$ ,  $p = 0.61$ , 21 occasions, 143 sites).

| G    | $\alpha$ | R   |     |     |      |
|------|----------|-----|-----|-----|------|
|      |          | 0.5 | 0.3 | 0.2 | 0.15 |
| 0.8  | 0.05     | 57  | 173 | 400 | 717  |
|      | 0.1      | 45  | 136 | 315 | 565  |
|      | 0.2      | 33  | 100 | 230 | 412  |
| 0.85 | 0.05     | 66  | 198 | 457 | 820  |
|      | 0.1      | 53  | 159 | 366 | 656  |
|      | 0.2      | 39  | 119 | 274 | 491  |
| 0.9  | 0.05     | 77  | 232 | 535 | 959  |
|      | 0.1      | 63  | 189 | 436 | 782  |
|      | 0.2      | 48  | 145 | 334 | 600  |
| 0.95 | 0.05     | 95  | 286 | 661 | 1186 |
|      | 0.1      | 79  | 239 | 551 | 988  |
|      | 0.2      | 63  | 189 | 436 | 782  |
